# Supplementary material for: Next-Generation Survey Sequencing and the Molecular Organization of Wheat Chromosome 6B
Source: PubMed Central journal article supplement (PMC3989483; doi:10.1093/dnares/dst041), 2013-10-01
Supplement: supp_dst041_dst041supp.pdf [file supp_dst041_dst041supp.pdf]

Supplemental Table 1. The summary of the FISH analysis of the transposon sequences on chromosome 6B.

| Type    | Class     | Family   | Primer number | Sequence used for primer design (GenBank Acc. #) | Forward primer  |                          | Reverse primer       |                         |                        | FISH          |                     |                    |           |
|---------|-----------|----------|---------------|--------------------------------------------------|-----------------|--------------------------|----------------------|-------------------------|------------------------|---------------|---------------------|--------------------|-----------|
|         |           |          |               |                                                  | Position        | Sequence                 | Position             | Sequence                | Expected amplicon size | Amplification | Uniquitous labeling | Localization on 6B |           |
| Type I  | Gypsy     | nusif    | 1             | FN564426                                         | 220823-220842   | GAGGAGGCGGAGAGATCAAG     | 220929-220948        | GCACCAAAGAGGAAACAAGG    | 128                    | Discrete      | Yes                 | Dispersed          |           |
|         |           |          | 1             | HE774675                                         | 154914-154933   | AGTAGTTGCGGATGCTTGCT     | 154787-154806        | GAGTTGCGGAATTGTCCTA     | 156                    | Discrete      | Yes                 | Dispersed          |           |
|         |           |          | 1             | FN564426                                         | 1500515-1500537 | GGTTTTGTTGAGTTTTGTGTGA   | 1500388-1500407      | CATCCCAAGCTTAGTTGCT     | 154                    | Discrete      | Yes                 | Dispersed          |           |
|         |           | laura    | 1             | FN564430                                         | 1792915-1792934 | TGCGGTAGTTGAATCCCTTT     | 1792744-1792763      | GTTCACACACCTCCGATTCA    | 194                    | Discrete      | No (2 genomes)      | Dispersed          |           |
|         |           |          | 1             | FN564428                                         | 2507167-2507186 | AAACCGGATGGGTTTAGTCC     | 2507342-2507361      | GAGACAGGGGACACGATTGT    | 205                    | Discrete      | No (2 genomes)      | Dispersed          |           |
|         |           |          | 2             | FN564428                                         | 2507167-2507186 | AAACCGGATGGGTTTAGTCC     | 2507329-2507348      | CGATGTTTTACCCAGGTTCC    | 192                    | Discrete      | No (1 genome)       | Dispersed          |           |
|         |           | sabrina  | 1             | JF701619                                         | 146285-146304   | TTGATGTATCGCGAGCTTTG     | 146011-146030        | TGCCCAAAGTTTCTACCAG     | 299                    | Discrete      | No (2 genomes)      | Dispersed          |           |
|         |           |          | 2             | FJ447464                                         | 56575-56594     | ACCATCTCTTCGCGAATA       | 56723-56742          | TTCCCTCAAGTGGATGACC     | 167                    | Discrete      | No (2 genomes)      | Dispersed          |           |
|         |           |          | 3             | HE774676                                         | 24311-24330     | TCGAGATCCGATGAATTGTG     | 24505-24524          | CCCCTACTGTCACTGGGAAA    | 213                    | Discrete      | No (2 genomes)      | Dispersed          |           |
|         |           |          | 4             | FN564431                                         | 57459-57478     | ATCCCTCTTTCGTCTTCGT      | 57574-57595          | CAGCAAGGATGATTGTGGTAAA  | 136                    | Discrete      | No (2 genomes)      | Dispersed          |           |
|         |           | Copia    | wham          | 1                                                | FN564430        | 998301-998320            | TCGCGTTTTACGATACTGGA | 998142-998161           | CAGCAAGCCTACGATGGAAT   | 179           | Discrete            | Yes                | Dispersed |
|         |           |          |               | 1                                                | HE774676        | 1156500-1156519          | ACATGACCCATTCCGTTAGC | 1156605-1156624         | AAGGTGTTCTCCGGTATCC    | 126           | Discrete            | Yes                | Dispersed |
|         |           | angela   | 2             | FN564427                                         | 729827-729846   | CCAGGTTCCGCTATTGGTTA     | 729611-729630        | TTCCGGTGTCCGAATATAGC    | 241                    | Discrete      | Yes                 | Dispersed          |           |
| Type II | CACTA     | clifford | 1             | FN645450                                         | 1258990-1259009 | CCGGAGGAGAAGGTAGATCC     | 1258915-1258934      | ATGCGCTCATAGTTGCCTTT    | 99                     | Discrete      | Yes                 | Dispersed          |           |
|         |           |          | 1             | FN564436                                         | 572271-572290   | GACCGTAGTGCTCCAACACA     | 572187-572206        | GGAGGAAACGGACCTCCTAC    | 104                    | Smear         | Yes                 | Dispersed          |           |
|         |           |          | 1             | FN564430                                         | 1109949-1109968 | AAACCACCTCTGTGGTCAGG     | 1109710-1109729      | GCAAGCTTCACATGCAACAT    | 257                    | Discrete      | Yes                 | Dispersed          |           |
|         |           |          | 1             | FN564434                                         | 1269040-1269059 | GGTGCTTGTTGGTTGCTAGT     | 12496-12515          | GACTTCTCCCATGTCCTCA     | 174                    | Discrete      | Yes                 | Dispersed          |           |
|         |           |          | 1             | AM932684                                         | 29857-29876     | CGTACCATGCATGACACCTC     | 29757-29776          | CTTGGGCGATCGTGAAAAT     | 123                    | Discrete      | No (2 genomes)      | Dispersed          |           |
|         | Mariner   | caspar   | 2             | FN564434                                         | 1168185-1168204 | CAGTGCGGAGTCTTGTGAA      | 1167999-1168018      | CGCCATCTTCTAAAAGCAG     | 206                    | Discrete      | No (2 genomes)      | Dispersed          |           |
|         |           |          | 1             | HQ391329                                         | 1- 24           | ACAACATACTACTCCCTCTGTCCC | 242-261              | GCAGTTGGGCACAGTTGGCT    | 260                    | Non discrete  | Yes                 | Dispersed          |           |
|         |           |          | 1             | HQ703016                                         | 1258-1277       | AGAACTGGGTAGCCGAGGA      | 1448-1467            | GATTGCAGCCACAACCTCTGA   | 209                    | Smaller       | No (2 genomes)      | Dispersed          |           |
|         | Harbinger | kerberos | 1             | AK335477                                         | 879-897         | CTGTTAGCAGCGGACAAG       | 1090-1113            | GCAATAAAGAGTGAATAGAAGC. | 234                    | Smaller       | Yes                 | Dispersed          |           |
|         |           |          | 1             | FN564430                                         | 845136-845155   | AGAGAAGGTAAGCGGGCTCT     | 845283-845302        | TAAGCACTTGCCATGTACC     | 171                    | Discrete      | No (2 genomes)      | Dispersed          |           |
|         | unknown   | unknown  | xc            | 1                                                | AK331835        | 469-487                  | GCCTTAGCAGCAGACTTC   | 565-584                 | GCGACGACTACAAGCACTGA   | 115           | Discrete            | Yes                | Dispersed |

Transposons present in the 6B survey sequences were arbitrarily selected. They belong to Type I (retrotransposon) or Type II (DNA transposon). Type I transposons were further classified to Class and Family according to the sequence homology to the TREP, the Triticeae Repeat Sequence Database (<http://wheat.pw.usda.gov/ITMI/Repeats/>). For each transposon family, Genbank accession number of the sequence used for primer design, position of primer, primer sequence, and results of PCR and FISH are given. The result of PCR indicate whether PCR primers gave the discrete band. The FISH results indicate the hybridization pattern in terms of hexaploid genome-wide ("Yes" indicate dispersed on three genomes, "No" indicate the genome specific hybridization with number of the positive genomes in parentheses) and distribution on the 6B chromosome.

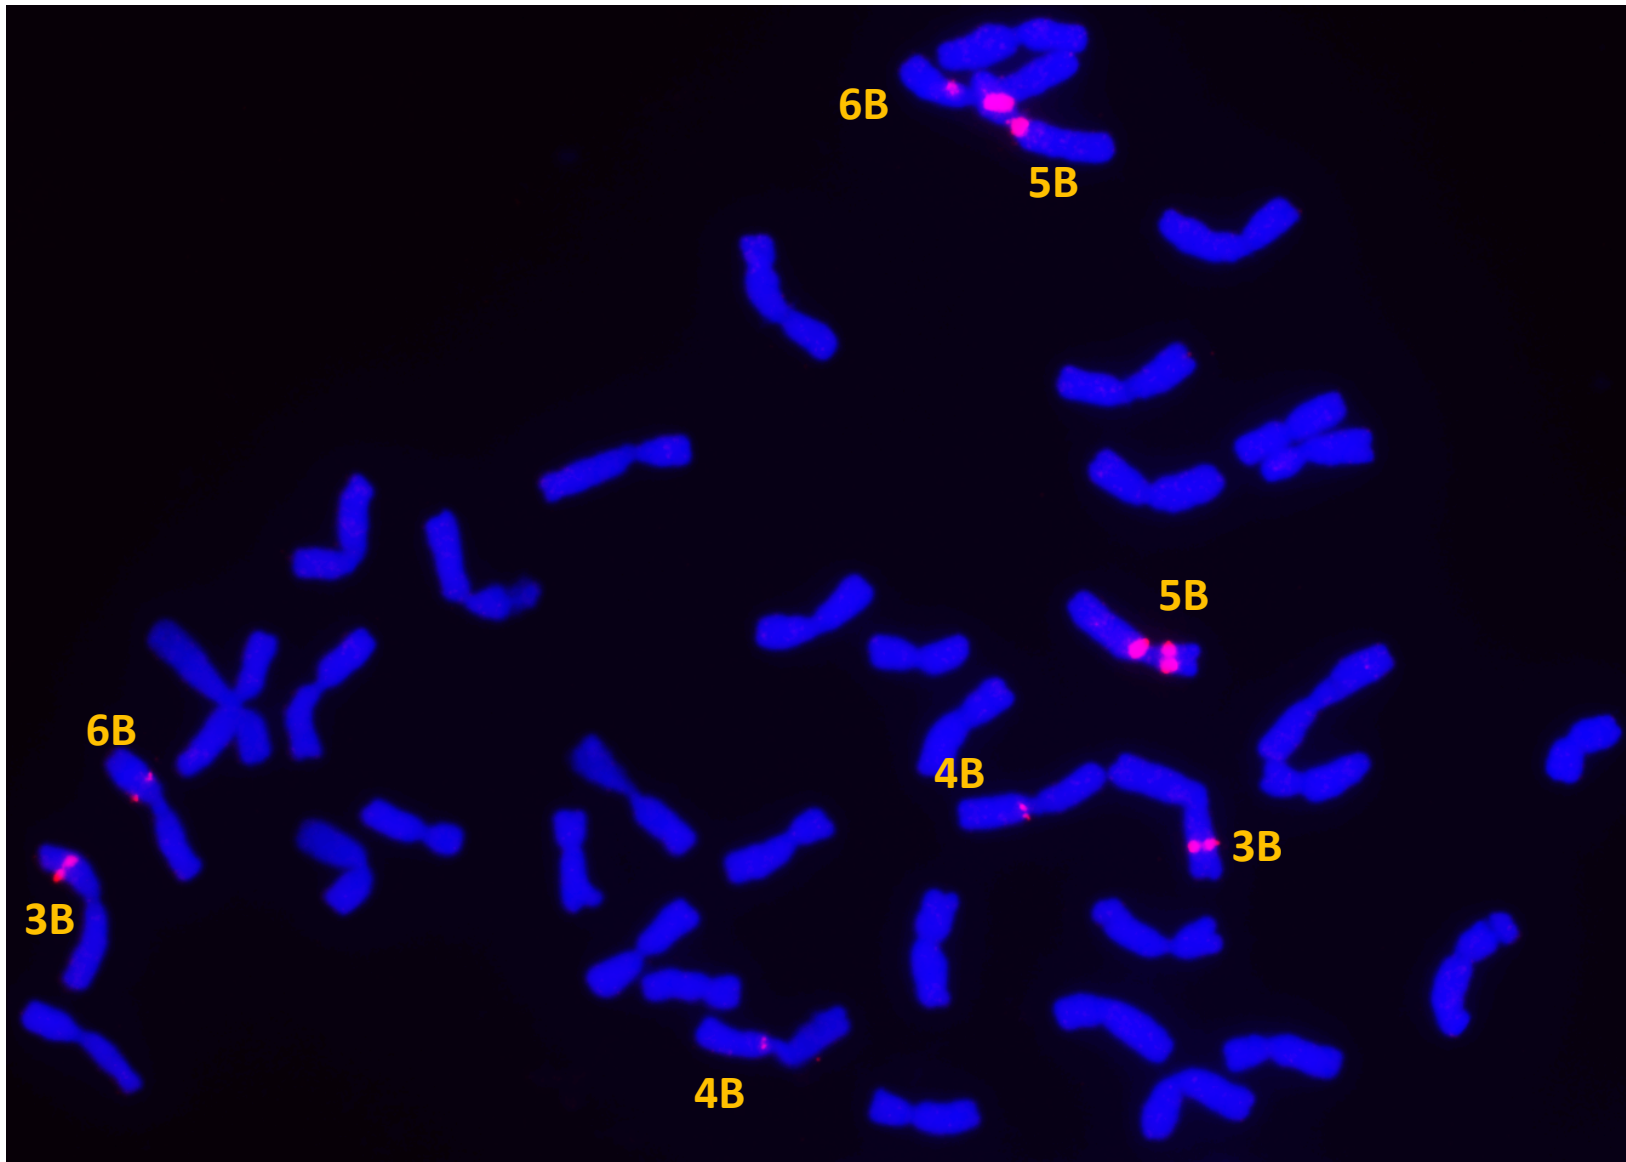

**Supplemental Figure 1.** The FISH pattern of the mitotic metaphase chromosome probed with the AG<sub>12</sub> satellite sequence. The probed region (shown in red) was detected by Cy3-Streptavidin (GE Healthcare Life Sciences, USA), and the chromosomes were counterstained with DAPI (4',6-diamidino-2-phenylindole, shown in blue). Note that chromosome 6B can be identified by the presence of satellite and AG<sub>12</sub> signals on the short arm.

# Vil-2 (DQ886917.1)

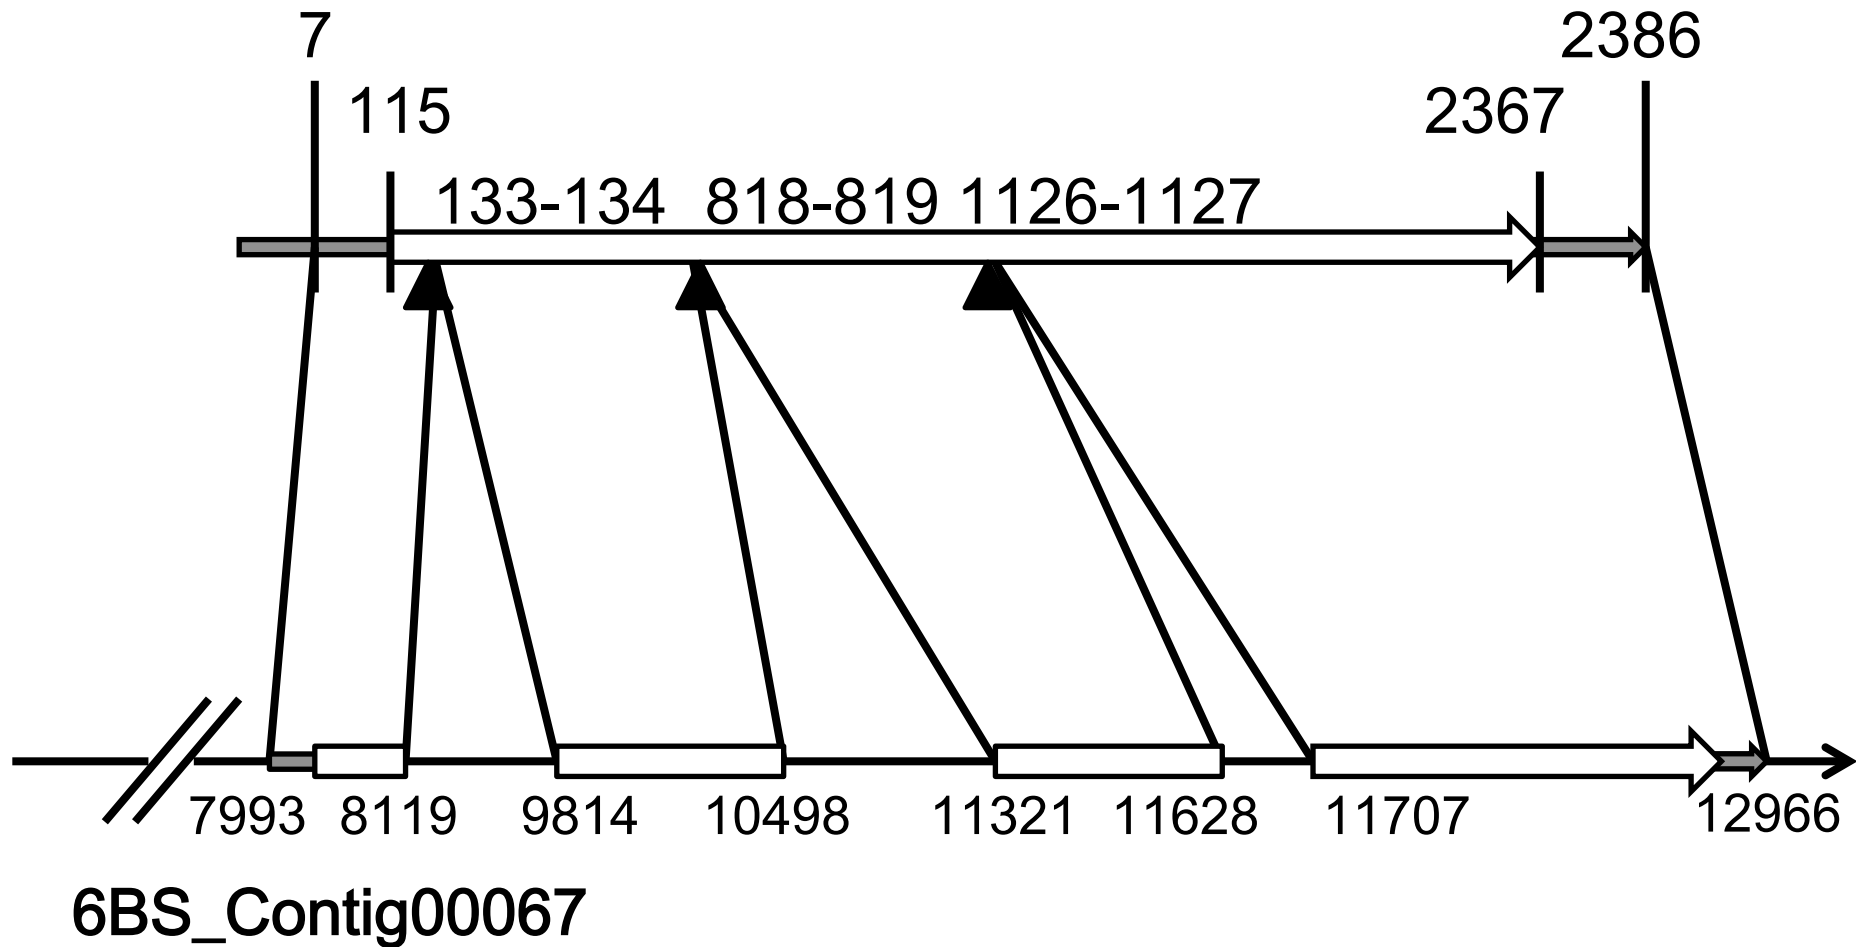

**Supplemental Figure 2.** The gene structures of *TmVIL2* and its orthologue on the short arm of chromosome 6B. The positions of the alignable regions and introns are given. The grey arrows represent the UTRs, and the white boxes represent the CDSs.
